# Supplementary material
Source: Springer Nature journal article supplement (https://www.springermedizin.de/resource/supplementary/12936_2012_2605_MOESM1_ESM.pdf/9543276)

**Gametocytes/  $\mu\text{L}$**

5000

500

50

Before

24h

post PQ

Before

24h

post PQ

**Oocysts (%)**

100

50

0

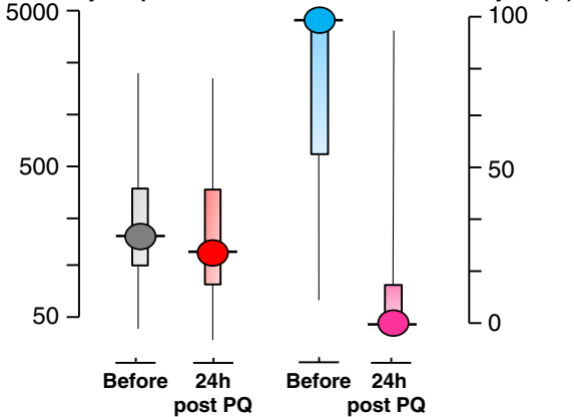

Supplement: MOESM1 [file 9543276]
